# Supplementary material for: The role of down staging treatment in the management of locally advanced intrahepatic cholangiocarcinoma: Review of literature and pooled analysis
Source: PubMed Central journal article supplement — Ann Hepatobiliary Pancreat Surg. 2020 Feb 27;24(1):6–16. doi: 10.14701/ahbps.2020.24.1.6 (PMC7061034; doi:10.14701/ahbps.2020.24.1.6), 2020-02-27
Supplement: ahbps-24-6-s001.pdf [file ahbps-24-6-s001.pdf]

**Supplementary Table 1.** Summary of search terms for literature review

|    | Search terms                                             | Number of studies |
|----|----------------------------------------------------------|-------------------|
| 1  | exp Bile Duct Neoplasms/                                 | 47646             |
| 2  | exp Gallbladder Neoplasms/                               | 20651             |
| 3  | exp Cholangiocarcinoma/                                  | 31995             |
| 4  | Intrahepatic cholangiocarcinoma.ti,ab.                   | 6439              |
| 5  | Hilar cholangiocarcinoma.ti,ab.                          | 3391              |
| 6  | Perihilar cholangiocarcinoma.ti,ab.                      | 930               |
| 7  | gallbladder cancer.ti,ab.                                | 7878              |
| 8  | gallbladder carcinoma.ti,ab.                             | 4955              |
| 9  | Klatskin.ti,ab.                                          | 1233              |
| 10 | 1 or 2 or 3 or 4 or 5 or 6 or 7 or 8 or 9                | 71157             |
| 11 | exp NEOADJUVANT THERAPY/                                 | 28544             |
| 12 | neoadjuvant.ti,ab.                                       | 87397             |
| 13 | neoadjuvant radiotherapy.ti,ab.                          | 1477              |
| 14 | neoadjuvant chemotherapy.ti,ab.                          | 38243             |
| 15 | neoadjuvant chemoradiotherapy.ti,ab.                     | 5604              |
| 16 | neoadjuvant radiochemotherapy.ti,ab.                     | 1274              |
| 17 | chemotherapy.ti,ab.                                      | 934928            |
| 18 | radiotherapy.ti,ab.                                      | 415139            |
| 19 | chemoradiotherapy.ti,ab.                                 | 43263             |
| 20 | radiochemotherapy.ti,ab.                                 | 9818              |
| 21 | 11 or 12 or 13 or 14 or 15 or 16 or 17 or 18 or 19 or 20 | 1261834           |
| 22 | unresectable.ti,ab.                                      | 48947             |
| 23 | advanced cancer.ti,ab.                                   | 30713             |
| 24 | advanced.ti,ab.                                          | 1100294           |
| 25 | locally advanced.ti,ab.                                  | 77239             |
| 26 | 22 or 23 or 24 or 25                                     | 1132585           |
| 27 | 10 and 21 and 26                                         | 3037              |
